# Supplementary material for: Comparison of Silk Hydrogels Prepared via Different Methods
Source: MDPI journal article supplement (doi:10.3390/polym15224419), 2023-11-16
Supplement: s1 [file s1]

## Comparison of Silk Hydrogels Prepared via Different Methods

Jiahui Hua, Renyan Huang, Ying Huang\*, Shuqin Yan\*, Qiang Zhang

State Key Laboratory of New Textile Materials and Advanced Processing Technologies,  
School of Textile Science and Engineering, Wuhan Textile University, Wuhan 430200,  
China

**Corresponding authors.**

E-mails: yingh@wtu.edu.cn (Y. Huang); ysq\_zq@163.com (S. Yan)

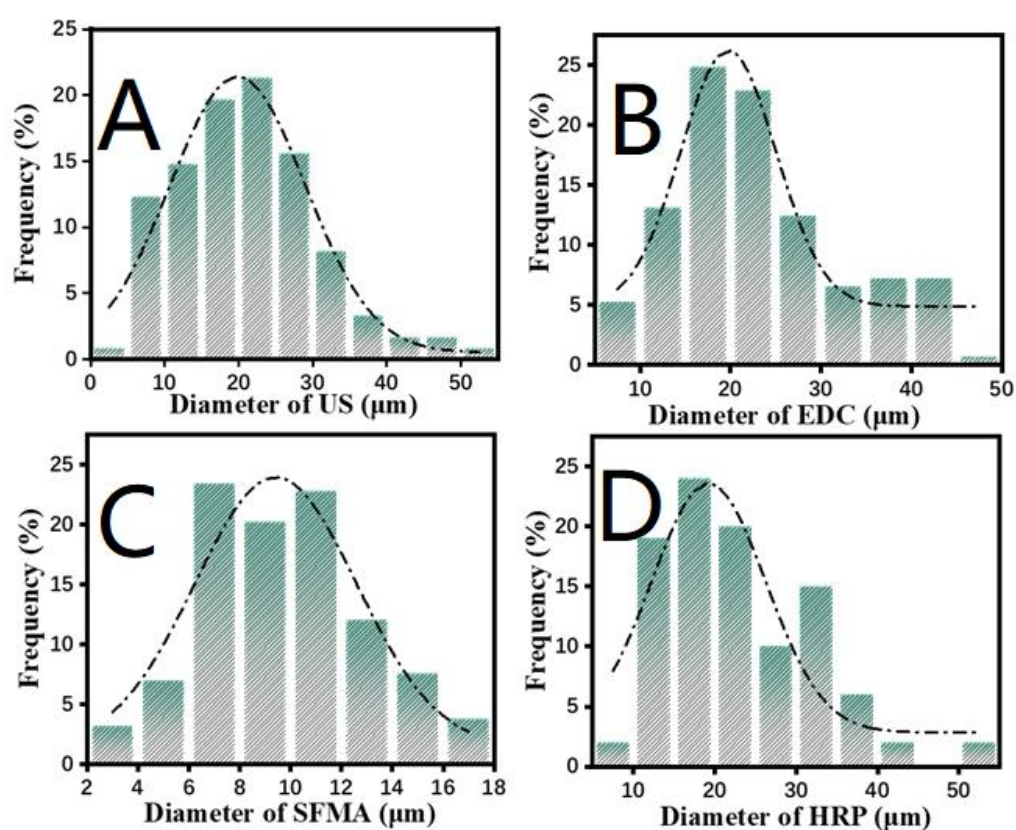

**Figure S1.** Pore size distribution of four types of SF fibroin hydrogels in dry state. (A) Ultrasound and (B) EDC and (C) SFMA and (D) HRP.
